# Supplementary material for: TTN mutations predict a poor prognosis in patients with thyroid cancer
Source: Oxford University Press journal article supplement (doi:10.1042/bsr20221168), 2022-06-29
Supplement: bsr-2022-1168_supp.pdf [file bsr-2022-1168_supp.pdf]

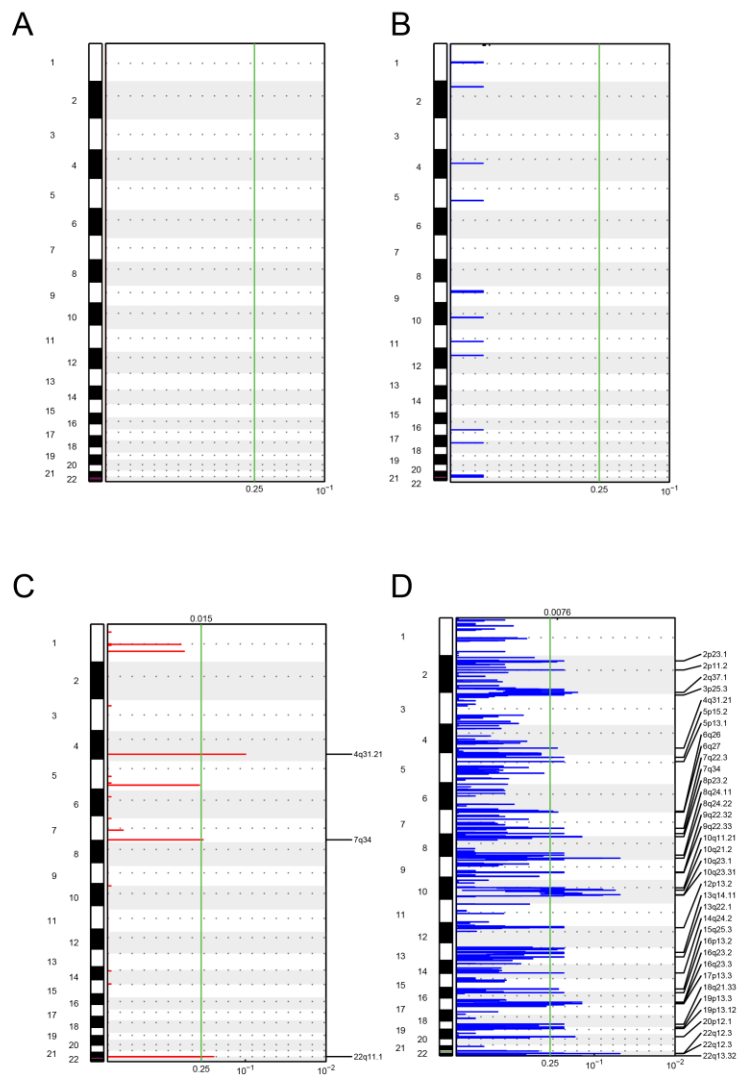

**Figure S1** Copy Number Variation in Patients with THCA. (A-B) Copy number amplification and copy number deletion in the MUT group. (C-D) Copy number amplification and copy number deletion in the WT group. Red represents amplification and blue represents deletion.
